# Supplementary material for: A Systematic Review on the Impact of the Social Confinement on People with Autism Spectrum Disorder and Their Caregivers during the COVID-19 Pandemic
Source: MDPI journal article supplement (doi:10.3390/brainsci11111389), 2021-10-22
Supplement: s1 [file s1]

**Table S1.** Description of the characteristics of the 17 analyzed studies

| Authors                                                                             | Country      | Study design                               | Sample size & characteristics                                 | Methods                                          | Focus                                                    | Standards Assessment tools                       |
|-------------------------------------------------------------------------------------|--------------|--------------------------------------------|---------------------------------------------------------------|--------------------------------------------------|----------------------------------------------------------|--------------------------------------------------|
| <b>Physical Activity</b>                                                            |              |                                            |                                                               |                                                  |                                                          |                                                  |
| [51] Exentürk, 2020                                                                 | Turkey       | Qualitative                                | 10 parents                                                    | Semi-structured inter-views phone                | Parents' perceptions on physical activity                |                                                  |
| [52] Garcia et al., 2020                                                            | USA          | Descriptive                                | 9 adolescents                                                 | Digital Survey                                   | ASD subjects                                             |                                                  |
| [53] Pfeiffer, y otros, 2021)                                                       | USA          | Descriptive                                | 6 young adults with ASD                                       | GPS methods and daily participant questionnaires | Changes in activity space use and community mobility     | GPS-enabled cell phones                          |
| <b>Psychological Distress among parents of children with ASD</b>                    |              |                                            |                                                               |                                                  |                                                          |                                                  |
| [54] Colizzi et al., 2020                                                           | Italy        | Descriptive                                | 529 parents                                                   | Digital Survey                                   | Parents wellbeing and needs                              |                                                  |
| [55] Manning et al., 2020                                                           | USA          | Descriptive                                | 471 respondents                                               | Digital Survey                                   | Levels of stress and disruption to life                  |                                                  |
| [56] Alhuzimi, 2021                                                                 | Saudi Arabia | Descriptive                                | 150 parents ASD children < 18 years old                       | e-mail Survey                                    | Stress and emotional well-being of parents               | PSI/SF [57]<br>GHQ-12 [58]                       |
| [59] Althiabi, 2021                                                                 | Saudi Arabia | Two groups (with and Without ASD children) | 211 parents With children < 18 years old                      | Digital Survey                                   | Attitude, anxiety and perceived mental health care needs | FIQ [60]<br>HADS [61]<br>GHQ-12[58]              |
| [62] Wang et al., 2021                                                              | China        | Two groups (with and Without ASD children) | 1764 parents ASD children<br>4962 parents Typical Development | Digital Survey                                   | Psychological distress parents                           | CD-RISC [63]<br>CSQ [64]<br>SAS [65]<br>SDS [66] |
| [67] Meral, 2021                                                                    | Turkey       | Descriptive qualitative and quantitative   | 32 parents ASD children                                       | synchronous video call                           | Quality of live                                          | BFDS [68]<br>FQOL [69]                           |
| <b>Impact of containment and mitigation measures on children and youth with ASD</b> |              |                                            |                                                               |                                                  |                                                          |                                                  |
| [26] Amorim et al., 2020                                                            | Portugal     | Descriptive                                | 99 parents<br>43 ASD children<br>56 TD children               | Digital Survey                                   | Children                                                 | Author's elaboration                             |
| [70] Jeste et al., 2020                                                             | USA          | Descriptive                                | 818 caregiver                                                 | Digital Survey                                   | Changes in access to educational and healthcare services |                                                  |

|                                 |        |                                                                                  |                                              |                                                                                               |                                                                                                               |                                        |
|---------------------------------|--------|----------------------------------------------------------------------------------|----------------------------------------------|-----------------------------------------------------------------------------------------------|---------------------------------------------------------------------------------------------------------------|----------------------------------------|
| [71] Mutluer et al., 2020       | Turkey | Descriptive and comparison of behaviours before and after the confinement period | 87 children and young adults (3-29 years)    | Patients data base collection and Digital Survey                                              | Study of the specific challenges generated for pandemic Covid-19 to individuals with ASD and their caregivers | ABC [72]<br>PSQI [73]<br>BAI [74]      |
| [75] Berard et al., 2021        | France | Descriptive cross-sectional                                                      | 239 parents ELENA [77] cohort 2-21 years old | Digital Survey                                                                                | Children                                                                                                      | COVID-19 questionnaire                 |
| [77] Lugo-Marín et al., 2021    | Spain  | Descriptive                                                                      | 37 Childrens<br>35 adults                    | Digital Survey                                                                                | Children<br>Adults                                                                                            | CBCL [78]<br>SCL-90-R [79]             |
| [80] Mumbardó-Adam et al., 2021 | Spain  | Descriptive                                                                      | 47 Parents ASD children                      | Semi-structured online survey                                                                 | Children/ family management quarantine                                                                        |                                        |
| [81] White et al., 2021         | USA    | Descriptive                                                                      | 70 faces                                     | Anonymous online survey                                                                       | Tele-health services                                                                                          |                                        |
| [82] Siracusano et al., 2021    | Italy  | Descriptive and comparison of behaviours before and after the confinement period | 85 children                                  | Clinical database of the Child Psychiatry Unit of the University of Rome Tor Vergata Hospital | Adaptive functioning, behavioral problems, and repetitive behaviors                                           | ABAS-II [83]<br>RBS-R[84]<br>CBCL [78] |
